# Supplementary material for: Differential Membrane Dipolar Orientation Induced by Acute and Chronic Cholesterol Depletion
Source: PubMed Central journal article supplement (PMC5493612; doi:10.1038/s41598-017-04769-4), 2017-06-30
Supplement: 41598_2017_4769_MOESM1_ESM.pdf [file 41598_2017_4769_MOESM1_ESM.pdf]

# Supporting Information

## Differential Membrane Dipolar Orientation Induced by Acute and Chronic Cholesterol Depletion

Parijat Sarkar<sup>†</sup>, Hirak Chakraborty<sup>†, #</sup>, and Amitabha Chattopadhyay<sup>†, \*</sup>

<sup>†</sup>CSIR-Centre for Cellular and Molecular Biology, Uppal Road, Hyderabad 500 007, India; <sup>#</sup>School of Chemistry, Sambalpur University, Jyoti Vihar, Burla, Odisha 768 019, India

\*To whom correspondence should be addressed: Phone: +91-40-2719-2578,  
Fax: +91-40-2716-0311, E-mail: amit@ccmb.res.in

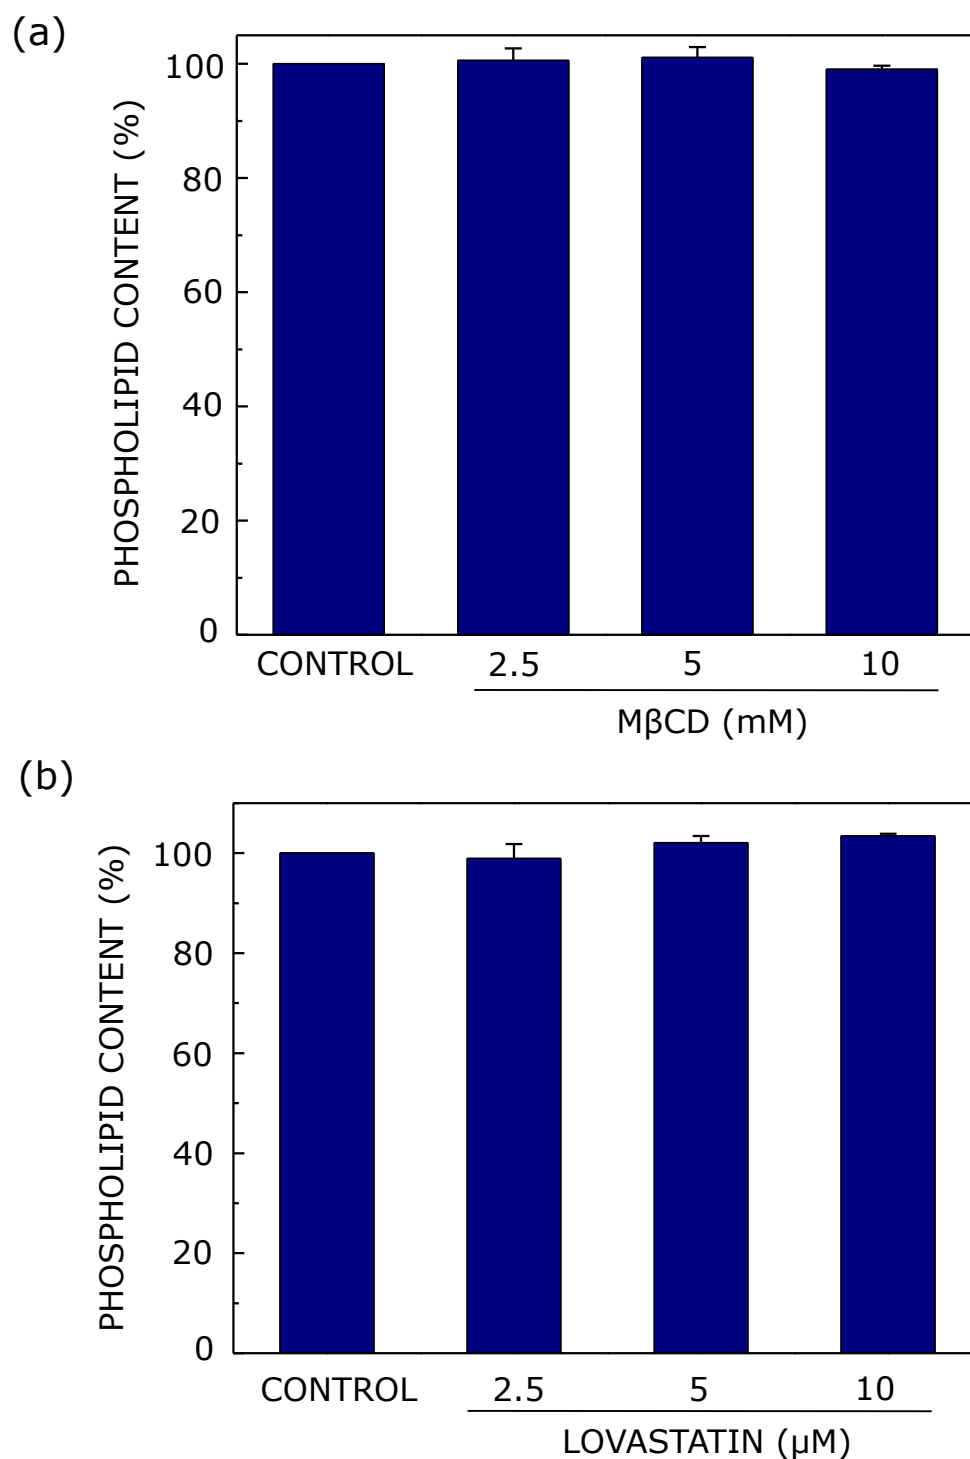

**Figure S1. Membrane phospholipid content remains invariant upon acute or chronic cholesterol depletion.** Effect of increasing concentration of (a) M $\beta$ CD and (b) lovastatin on phospholipid content of CHO-K1 cell membranes. Values are expressed as percentage of phospholipid content for cell membranes in the absence of M $\beta$ CD or lovastatin treatment. Data represent means  $\pm$  S.E. of at least three independent measurements. See Methods for other details.

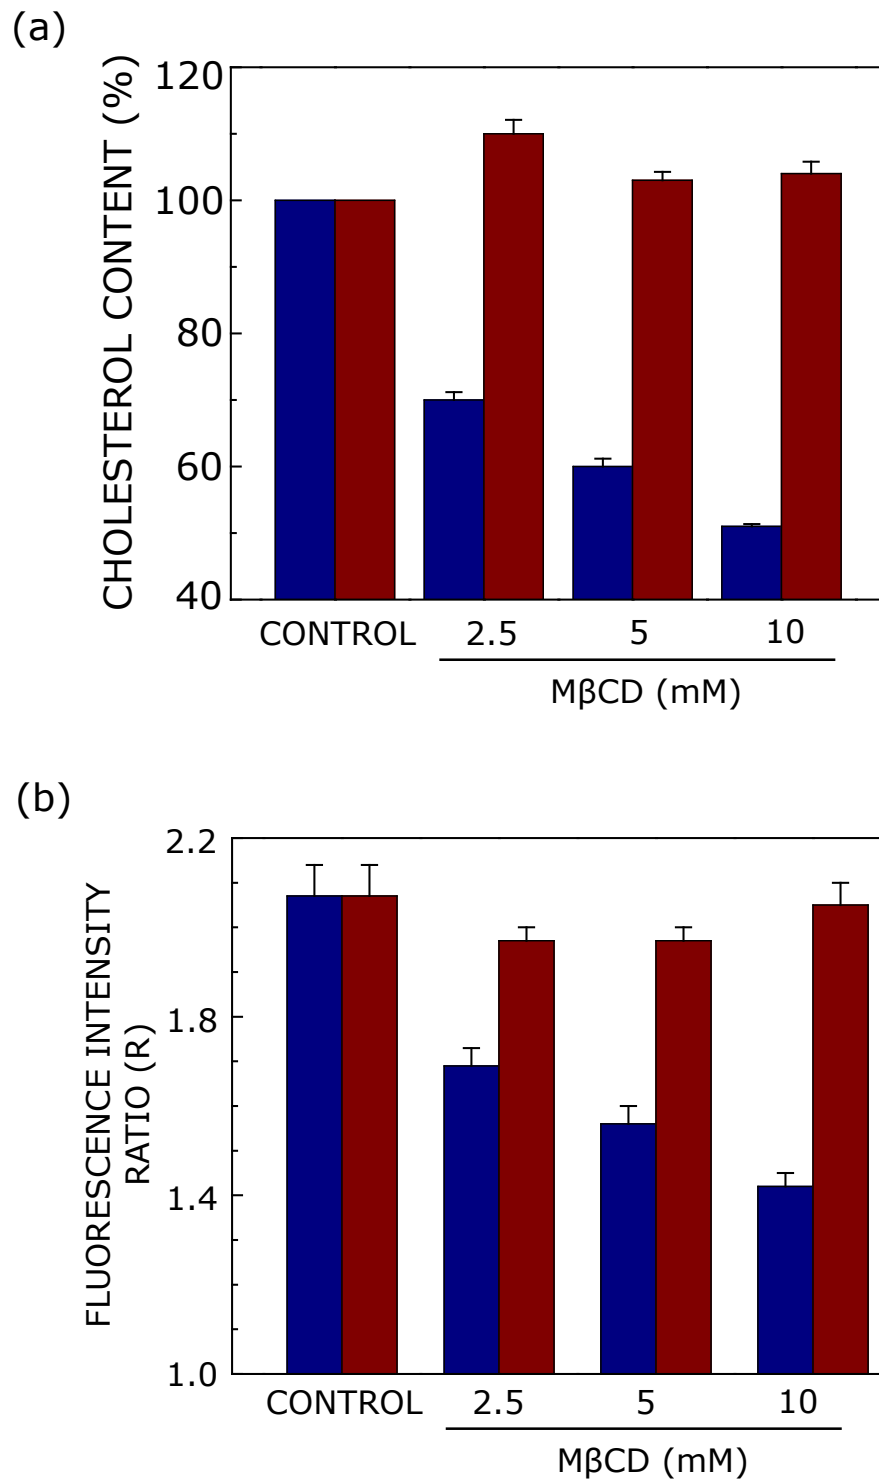

**Figure S2.** The change in membrane dipole potential upon acute cholesterol depletion could be reversed upon replenishment with cholesterol. Cholesterol content (a) and fluorescence intensity ratio, R (b) for cholesterol-depleted (blue bars) and cholesterol-replenished (maroon bars) are shown. See Methods for other details.

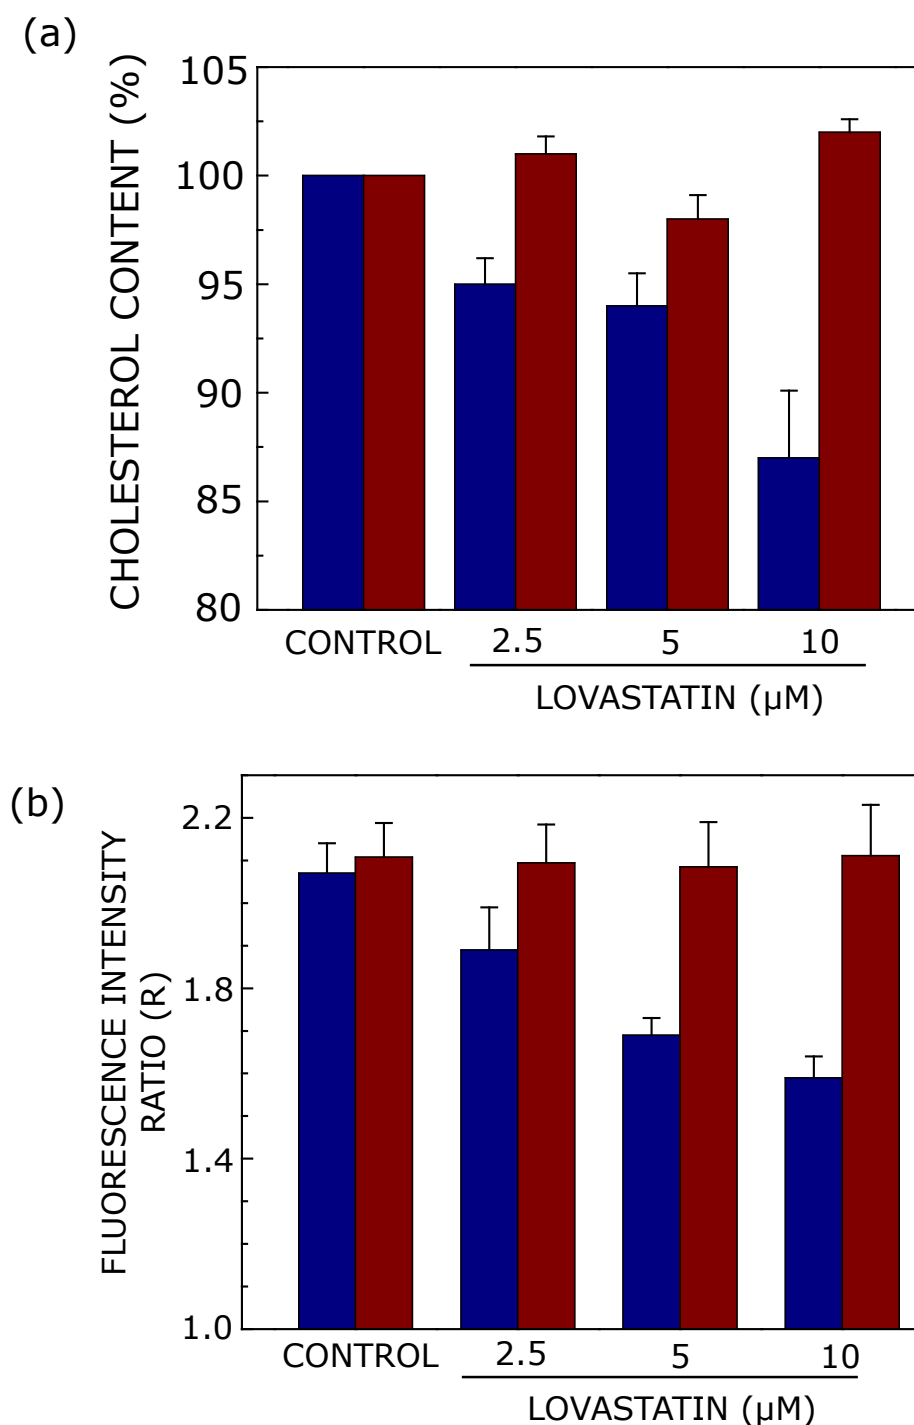

**Figure S3.** The change in membrane dipole potential upon chronic cholesterol depletion could be reversed upon replenishment with cholesterol. Cholesterol content (a) and fluorescence intensity ratio, R (b) for cholesterol-depleted (blue bars) and cholesterol-replenished (maroon bars) are shown. See Methods for other details.
